# Supplementary material
Source: Springer Nature journal article supplement (https://www.springermedizin.de/resource/supplementary/12993_2012_453_MOESM4_ESM.pdf/9617796)

● saline + baclofen (0.5 nmol)  
◇ 2-OH-saclofen (5 nmol) + baclofen

○ saline + saline  
◆ saline + 2-OH-saclofen

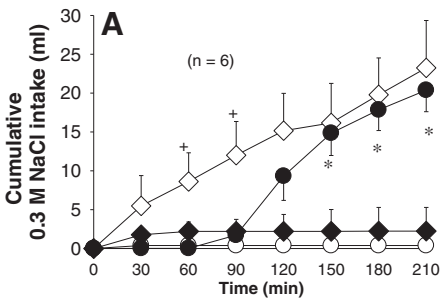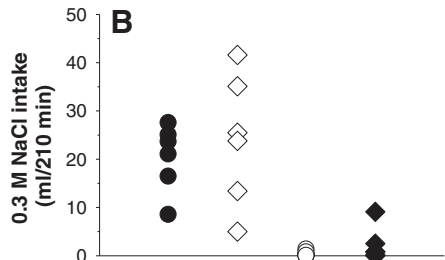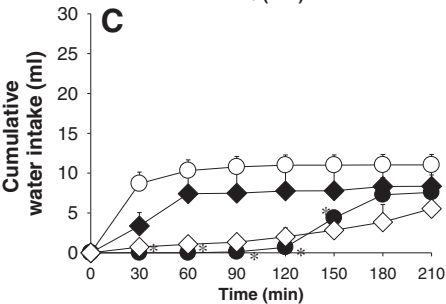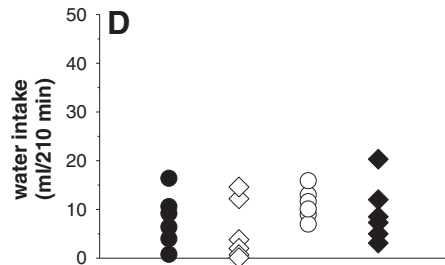

Supplement: MOESM4 [file 9617796]
